# Supplementary material
Source: Springer Nature journal article supplement (https://www.springermedizin.de/resource/supplementary/13058_2006_1574_MOESM3_ESM.pdf/9699428)
Supplement: MOESM3 [file 9699428]

|                               | Error rate    | Gene Set Size | Predictor Size | Training Error   | PAM Cross-Validation Error Rate |
|-------------------------------|---------------|---------------|----------------|------------------|---------------------------------|
| Menopausal Status - SAM       | 0.5 ± 0       | 73 ± 18.5     | 25.7 ± 4.73    | 0.0667 ± 0.0577  | 0.3 ± 0.132                     |
| Menopausal Status - Limma     | 0.357 ± 0.244 | 3430 ± 82.5   | 29.9 ± 15.1    | 0.00714 ± 0.0189 | 0.4 ± 0.112                     |
| ER- Limma                     | 0.55 ± 0.158  | 30.1 ± 7.78   | 16 ± 6.93      | 0.195 ± 0.0744   | 0.373 ± 0.0636                  |
| PR - Limma                    | 0.556 ± 0.3   | 1710 ± 120    | 32.8 ± 16.6    | 0.0152 ± 0.0227  | 0.54 ± 0.11                     |
| Lymph Node - Limma            | 0.455 ± 0.35  | 14.9 ± 5.56   | 6.09 ± 4.93    | 0.233 ± 0.0653   | 0.466 ± 0.123                   |
| HER2 - Limma                  | 0.5 ± 0       | 6850 ± 50.8   | 24.4 ± 5.5     | 0 ± 0            | 0.29 ± 0.0894                   |
| Grade - Limma                 | 0.222 ± 0.264 | 2490 ± 111    | 251 ± 497      | 0.058 ± 0.0307   | 0.396 ± 0.105                   |
| Adjacent vs Reduction - Limma | 0.5 ± 0.354   | 5480 ± 46.9   | 79.1 ± 107     | 0.0382 ± 0.0138  | 0.271 ± 0.0313                  |
| Recurrence - Limma            | 0.50 ± 0.41   | 8720 ± 19.48  | 31.25 ± 11.81  | 0.011 ± 0.022    | 0.283 ± 0.025                   |

Supplementary Table S3:
